# Supplementary material
Source: PubMed Central journal article supplement (PMC7196550)
Supplement: mmc1.pdf [file mmc1.pdf]

| Date of publication | Number of pregnant women (n) | Number of neonates (n) | Pregnancy                                                                                |   |                  |   | Mother         |   |              |   |            |   | Neonates             |   |               |   |           |   |             |   |    |
|---------------------|------------------------------|------------------------|------------------------------------------------------------------------------------------|---|------------------|---|----------------|---|--------------|---|------------|---|----------------------|---|---------------|---|-----------|---|-------------|---|----|
|                     |                              |                        | Amniotic fluid                                                                           |   | Placenta tissues |   | Maternal Serum |   | Vaginal swab |   | Breastmilk |   | Umbilical cord blood |   | Gastric juice |   | Anal swab |   | Throat swab |   |    |
|                     |                              |                        | +                                                                                        | - | +                | - | +              | - | +            | - | +          | - | +                    | - | +             | - | +         | - | +           | - |    |
| Zhu H and al.       | February 10, 2020            | 9                      |                                                                                          |   |                  |   |                |   |              |   |            |   |                      |   |               |   |           |   | 9           |   |    |
| Wang X and al.      | February 28, 2020            | 1                      |                                                                                          | 1 |                  | 1 |                |   |              |   |            |   |                      |   | 1             |   | 1         |   | 1           |   |    |
| Liu Y and al.       | March 5, 2020                | 10                     | No vertical transmission was reported but no detail of sample examination was available. |   |                  |   |                |   |              |   |            |   |                      |   |               |   |           |   |             |   |    |
| Chen H and al.      | March 7, 2020                | 9                      |                                                                                          | 6 |                  |   |                |   |              |   |            |   |                      | 6 |               |   |           |   | 6           |   |    |
| Zhang L and al.     | March 7, 2020                | 16                     |                                                                                          |   |                  |   |                |   |              |   |            |   |                      |   |               |   |           |   | 10          |   |    |
| Fan C and al.       | March 17, 2020               | 2                      |                                                                                          | 2 |                  | 2 |                | 2 |              | 2 |            | 2 |                      | 2 |               |   |           |   | 2           |   |    |
| Wang S and al.      | March 12, 2020               | 7                      |                                                                                          |   | 0                | 1 |                |   |              | 0 | 1          |   | 0                    | 1 |               |   |           | 1 | 2           |   |    |
| Yu N and al.        | March 24, 2020               | 3                      |                                                                                          |   |                  |   |                |   |              |   |            |   |                      |   |               |   |           |   | 1           |   |    |
| Zambrano L and al.  | March 25, 2020               | 1                      |                                                                                          |   |                  |   |                |   |              |   |            |   |                      |   |               |   |           |   | 1           |   |    |
| Zeng L and al.      | March 26, 2020               | 33                     |                                                                                          |   |                  |   |                |   |              |   |            |   |                      |   |               | 3 | 30        | 3 | 30          |   |    |
| Dong L and al.      | March 26, 2020               | 1                      |                                                                                          |   |                  |   |                |   | 1            |   |            |   | 1                    |   |               |   |           |   | 1           |   |    |
| Li Y and al.        | June, 2020                   | 1                      |                                                                                          | 1 |                  | 1 |                | 1 |              |   |            | 1 |                      | 1 |               |   |           |   | 1           |   |    |
|                     |                              | 47                     | 46                                                                                       | 0 | 10               | 0 | 5              | 0 | 3            | 0 | 3          | 0 | 10                   | 0 | 12            | 0 | 1         | 3 | 30          | 4 | 62 |

Zhu H, Wang L, Fang C, Peng S, Zhang L, Chang G, et al. Clinical analysis of 10 neonates born to mothers with 2019-nCoV pneumonia. *Translational Pediatrics*. 2020 Feb 10;9(1):51–60.

Wang X, Zhou Z, Zhang J, Zhu F, Tang Y, Shen X. A case of 2019 Novel Coronavirus in a pregnant woman with preterm delivery. *Clin Infect Dis*. 2020 Feb 28 ; Available from: <https://academic.oup.com/cid/advance-article/doi/10.1093/cid/ciaa200/5771323>

Liu Y, Chen H, Tang K, Guo Y. Clinical manifestations and outcome of SARS-CoV-2 infection during pregnancy. *Journal of Infection*. 2020 Mar 5 ; Available from: <http://www.sciencedirect.com/science/article/pii/S0163445320301092>

Chen H, Guo J, Wang C, Luo F, Yu X, Zhang W, et al. Clinical characteristics and intrauterine vertical transmission potential of COVID-19 infection in nine pregnant women: a retrospective review of medical records. *The Lancet*. 2020 Mar 7;395(10226):809–15.

Zhang L, Jiang Y, Wei M, Cheng BH, Zhou XC, Li J, et al. [Analysis of the pregnancy outcomes in pregnant women with COVID-19 in Hubei Province]. *Zhonghua Fu Chan Ke Za Zhi*. 2020 Mar 7;55(0):E009.

Fan C, Lei D, Fang C, Li C, Wang M, Liu Y, et al. Perinatal Transmission of COVID-19 Associated SARS-CoV-2: Should We Worry? *Clin Infect Dis*. 2020 Mar 17; Available from: <https://academic.oup.com/cid/advance-article/doi/10.1093/cid/ciaa226/5809260>

Wang S, Guo L, Chen L, Liu W, Cao Y, Zhang J, et al. A case report of neonatal COVID-19 infection in China. *Clin Infect Dis*. 2020 Mar 12;

Yu N, Li W, Kang Q, Xiong Z, Wang S, Lin X, et al. Clinical features and obstetric and neonatal outcomes of pregnant patients with COVID-19 in Wuhan, China: a retrospective, single-centre, descriptive study. *The Lancet Infectious Diseases*. 2020 Mar 24 ; Available from: <http://www.sciencedirect.com/science/article/pii/S1473309920301766>

Zambrano LI, Fuentes-Barahona IC, Bejarano-Torres DA, Bustillo C, Gonzales G, Vallecillo-Chinchilla G, et al. A pregnant woman with COVID-19 in Central America. *Travel Medicine and Infectious Disease*. 2020 Mar 25;101639.

Zeng L, Xia S, Yuan W, Yan K, Xiao F, Shao J, et al. Neonatal Early-Onset Infection With SARS-CoV-2 in 33 Neonates Born to Mothers With COVID-19 in Wuhan, China. *JAMA Pediatr*. 2020 Mar 26; Available from: <https://jamanetwork.com/journals/jamapediatrics/fullarticle/2763787>

Dong L, Tian, J, He S. Possible Vertical Transmission of SARS-CoV-2 From an Infected Mother to Her Newborn | *Neonatology* | *JAMA* | *JAMA Network*. 2020 Mar 26 ; Available from: <https://jamanetwork.com/journals/jama/fullarticle/2763853>

Li Y, Zhao R, Zheng S, Chen X, Wang J, Sheng X, et al. Lack of vertical transmission of severe acute respiratory syndrome coronavirus 2, China. *Emerg Infect Dis*. 2020 Apr. <https://doi.org/10.3201/eid2606.200287>
