# Supplementary material
Source: PubMed Central journal article supplement (PMC7196550)
Supplement: mmc2.pdf [file mmc2.pdf]

|                    | Date of publication | Number of pregnant women (n) | Number of neonates (n) | Time interval between symptom onset and delivery (days) | Delivery                |                  |                  |
|--------------------|---------------------|------------------------------|------------------------|---------------------------------------------------------|-------------------------|------------------|------------------|
|                    |                     |                              |                        |                                                         | Gestational age (weeks) | Cesarean section | Vaginal delivery |
| Zhu H and al.      | February 10, 2020   |                              | 9                      | 1 to 6                                                  | 31 to 39                | 7                | 2                |
| Wang X and al.     | February 28, 2020   | 1                            |                        | 3                                                       | 30                      | 1                |                  |
| Liu Y and al.      | March 5, 2020       | 13                           |                        |                                                         | 32 to 38                | 10               | 0                |
| Chen H and al.     | March 7, 2020       | 9                            |                        |                                                         | over 36                 | 9                |                  |
| Zhang L and al.    | March 7, 2020       | 16                           |                        |                                                         | 38,7                    | 16               |                  |
| Fan C and al.      | March 17, 2020      | 2                            |                        | 4 and 14                                                | 36+5 and 39             | 2                |                  |
| Liu D. and al.     | March 18, 2020      | 11                           |                        | 4 to 17                                                 | over 31                 | 10               | 1                |
| Yu N and al.       | March 24, 2020      | 7                            |                        | 1 to 3                                                  | 37 to 41+2              | 7                |                  |
| Zambrano L and al. | March 25, 2020      | 1                            |                        | 10                                                      | 32                      |                  | 1                |
| Dong L and al.     | March 26, 2020      |                              | 1                      | 25                                                      | 37+6                    | 1                |                  |
| Li Y and al.       | June, 2020          | 1                            |                        | 3                                                       | 35                      | 1                |                  |
|                    |                     | 61                           | 10                     | 1 to 25                                                 |                         | 64               | 4                |

Zhu H, Wang L, Fang C, Peng S, Zhang L, Chang G, et al. Clinical analysis of 10 neonates born to mothers with 2019-nCoV pneumonia. *Translational Pediatrics*. 2020 Feb 10 ;9(1):51–60.

Wang X, Zhou Z, Zhang J, Zhu F, Tang Y, Shen X. A case of 2019 Novel Coronavirus in a pregnant woman with preterm delivery. *Clin Infect Dis*. 2020 Feb 28 ; Available from: <https://academic.oup.com/cid/advance-article/doi/10.1093/cid/ciaa200/5771323>

Liu Y, Chen H, Tang K, Guo Y. Clinical manifestations and outcome of SARS-CoV-2 infection during pregnancy. *Journal of Infection*. 2020 Mar 5 ; Available from: <http://www.sciencedirect.com/science/article/pii/S0163445320301092>

Chen H, Guo J, Wang C, Luo F, Yu X, Zhang W, et al. Clinical characteristics and intrauterine vertical transmission potential of COVID-19 infection in nine pregnant women: a retrospective review of medical records. *The Lancet*. 2020 Mar 7;395(10226):809–15.

Zhang L, Jiang Y, Wei M, Cheng BH, Zhou XC, Li J, et al. [Analysis of the pregnancy outcomes in pregnant women with COVID-19 in Hubei Province]. *Zhonghua Fu Chan Ke Za Zhi*. 2020 Mar 7;55(0):E009.

Fan C, Lei D, Fang C, Li C, Wang M, Liu Y, et al. Perinatal Transmission of COVID-19 Associated SARS-CoV-2: Should We Worry? *Clin Infect Dis*. 2020 Mar 17; Available from: <https://academic.oup.com/cid/advance-article/doi/10.1093/cid/ciaa226/5809260>

Liu D, Li L, Wu X, Zheng D, Wang J, Yang L, et al. Pregnancy and Perinatal Outcomes of Women With Coronavirus Disease (COVID-19) Pneumonia: A Preliminary Analysis. *AJR Am J Roentgenol*. 2020 Mar 18;1–6.

Yu N, Li W, Kang Q, Xiong Z, Wang S, Lin X, et al. Clinical features and obstetric and neonatal outcomes of pregnant patients with COVID-19 in Wuhan, China: a retrospective, single-centre, descriptive study. *The Lancet Infectious Diseases [Internet]*. 2020 Mar 24 [cited 2020 Apr 3]; Available from: <http://www.sciencedirect.com/science/article/pii/S1473309920301766>

Zambrano LI, Fuentes-Barahona IC, Bejarano-Torres DA, Bustillo C, Gonzales G, Vallecillo-Chinchilla G, et al. A pregnant woman with COVID-19 in Central America. *Travel Medicine and Infectious Disease*. 2020 Mar 25;101639.

Dong L, Tian, J, He S. Possible Vertical Transmission of SARS-CoV-2 From an Infected Mother to Her Newborn | *Neonatology | JAMA | JAMA Network*. 2020 Mar 26 [cited 2020 Apr 1]; Available from: <https://jamanetwork.com/journals/jama/fullarticle/2763853>

Li Y, Zhao R, Zheng S, Chen X, Wang J, Sheng X, et al. Lack of vertical transmission of severe acute respiratory syndrome coronavirus 2, China. *Emerg Infect Dis*. 2020 Apr. <https://doi.org/10.3201/eid2606.200287>
